# Supplementary material for: Biochemical and Molecular Investigation of the Effect of Saponins and Terpenoids Derived from Leaves of Ilex aquifolium on Lipid Metabolism of Obese Zucker Rats
Source: MDPI journal article supplement (doi:10.3390/molecules27113376), 2022-05-24
Supplement: s1 [file s1]

**Table S1** Aroma profile of Argentine *I. paraguariensis* and European *I. aquifolium* and *I. meserveae*.

| No. | RI exp. | RI lit. | Compound                 | <i>Ilex paraguariensis</i> | <i>Ilex aquifolium</i>                  |              |                   | <i>Ilex meserveae</i> |          |             |
|-----|---------|---------|--------------------------|----------------------------|-----------------------------------------|--------------|-------------------|-----------------------|----------|-------------|
|     |         |         |                          |                            | Alaska                                  | Ferox Agenta | Rubricaulis Aurea | Blue Angel            | Blue Boy | Golden Girl |
|     |         |         |                          |                            | Concentration (µg*g <sup>-1</sup> ) d.w |              |                   |                       |          |             |
| 1   | 753     | 754     | (E)-2-Pentenal           | 2.48                       | -                                       | -            | -                 | -                     | -        | -           |
| 2   | 764     | 765     | 1-Pentanol               | 1.38                       | -                                       | -            | -                 | -                     | -        | -           |
| 3   | 766     | 767     | (Z)-2-Penten-1-ol        | 1.34                       | -                                       | -            | -                 | -                     | -        | -           |
| 4   | 780     | 782     | 3-Methyl-2-butenal       | 1.85                       | -                                       | -            | -                 | -                     | -        | -           |
| 5   | 802     | 800     | Hexanal                  | 13.80                      | -                                       | -            | -                 | 1.52                  | 1.18     | 2.45        |
| 6   | 838     | 837     | 2-Methyl-2-pentenal      | 11.77                      | -                                       | -            | -                 | -                     | -        | -           |
| 7   | 860     | 854     | (E)-2-Hexenal            | 1.77                       | 0.68                                    | -            | -                 | 12.28                 | 20.97    | 14.61       |
| 8   | 864     | 856     | 3-Hexen-1-ol             | -                          | 0.14                                    | -            | -                 | 11.85                 | 8.52     | 6.34        |
| 9   | 874     | 862     | (E)-2-Hexen-1-ol         | -                          | 0.15                                    | -            | -                 | -                     | -        | -           |
| 10  | 874     | 868     | 1-Hexanol                | 0.23                       | -                                       | -            | -                 | -                     | -        | -           |
| 11  | 875     | 879     | (Z)-4-Hexen-1-ol         | -                          | -                                       | -            | -                 | 1.68                  | 2.50     | 3.48        |
| 12  | 876     | 890     | 5-hidroksy-Pentanal      | 0.82                       | -                                       | -            | -                 | -                     | -        | -           |
| 13  | 893     | 891     | 2-Heptanone              | 2.50                       | -                                       | -            | -                 | -                     | -        | -           |
| 14  | 903     | 901     | Heptanal                 | 4.48                       | -                                       | 0.05         | 0.01              | 0.17                  | 0.13     | 0.06        |
| 15  | 918     | 911     | (E,E)-2,4-Hexadienal     | 1.36                       | -                                       | -            | -                 | -                     | -        | -           |
| 16  | 935     | 935     | 3-Hepten-2-one           | 0.28                       | -                                       | -            | -                 | -                     | -        | -           |
| 17  | 938     | 937     | α-Pinene                 | 0.19                       | 1.98                                    | 2.77         | 3.94              | 1.32                  | 0.57     | 0.47        |
| 18  | 953     | 952     | Camphene                 | -                          | 0.08                                    | 0.08         | 0.14              | 0.10                  | 0.02     | 0.02        |
| 19  | 960     | 956     | 2-Methyl-6-heptanone     | 1.88                       | -                                       | -            | -                 | -                     | -        | -           |
| 20  | 965     | 962     | Benzaldehyde             | 3.51                       | -                                       | -            | -                 | -                     | -        | -           |
| 21  | 975     | 970     | 1-Heptanol               | 3.00                       | -                                       | -            | -                 | -                     | -        | -           |
| 22  | 980     | 974     | Sabinene                 | -                          | 2.28                                    | 1.89         | 3.41              | 1.09                  | 0.62     | 0.70        |
| 23  | 983     | 980     | 1-Octen-3-ol             | 0.69                       | -                                       | 0.02         | -                 | -                     | -        | -           |
| 24  | 989     | 986     | 6-Methyl-5-heptene-2-one | 25.73                      | -                                       | -            | -                 | -                     | -        | -           |
| 25  | 993     | 991     | β-Myrcene                | 3.28                       | 1.66                                    | 0.88         | 1.35              | 0.46                  | 0.18     | 0.21        |
| 26  | 997     | 999     | Furfuryl methyl sulfide  | 3.64                       | -                                       | -            | -                 | -                     | -        | -           |

|    |      |      |                                   |       |       |       |       |       |       |       |
|----|------|------|-----------------------------------|-------|-------|-------|-------|-------|-------|-------|
| 27 | 1002 | 1000 | Decane                            | -     | 1.34  | 0.80  | 1.40  | 0.37  | 0.12  | 0.23  |
| 28 | 1003 | 1003 | Octanal                           | 5.88  | -     | -     | -     | -     | -     | -     |
| 29 | 1006 | 1005 | $\alpha$ -Phellandrene            | -     | 4.71  | 3.68  | 5.44  | 2.39  | 1.05  | 1.16  |
| 30 | 1012 | 1012 | (E,E)-2,4-Heptadienal             | 14.83 | -     | -     | -     | -     | -     | -     |
| 31 | 1020 | 1017 | $\alpha$ -Terpinene               | -     | 0.43  | 0.30  | 0.49  | 0.15  | -     | 0.08  |
| 32 | 1027 | 1025 | p-Cymene                          | 2.65  | 74.40 | 58.21 | 82.62 | 32.75 | 20.20 | 22.51 |
| 33 | 1032 | 1026 | o-Cymene                          | 2.41  | 2.35  | 1.02  | 1.70  | 0.55  | 0.10  | 0.25  |
| 34 | 1043 | 1031 | (E)-Oct-3-en-2-one                | 2.09  | -     | -     | -     | -     | -     | -     |
| 35 | 1047 | 1032 | Sylvestrene                       | 0.37  | -     | -     | -     | -     | -     | -     |
| 36 | 1053 | 1037 | $\beta$ -Ocimene                  | 0.28  | -     | -     | -     | -     | -     | -     |
| 37 | 1057 | 1054 | Prenyl isobutyrate                | 2.31  | -     | -     | -     | -     | -     | -     |
| 38 | 1063 | 1060 | $\gamma$ -Terpinene               | 4.78  | 1.27  | 0.74  | 1.23  | 0.46  | 0.21  | 0.32  |
| 39 | 1067 | 1067 | 3,5,5-Trimethylcyclohex-3-en-1-ol | 0.56  | -     | -     | -     | -     | -     | -     |
| 40 | 1074 | 1068 | (E,E)-3,5-Octadien-2-one          | 22.82 | -     | -     | -     | -     | -     | -     |
| 41 | 1078 | 1071 | 1-Octanol                         | -     | -     | -     | -     | 0.41  | 0.16  | -     |
| 42 | 1090 | 1074 | Linalool oxide                    | 1.81  | -     | -     | -     | -     | -     | -     |
| 43 | 1093 | 1090 | p-Cymenene                        | -     | 2.21  | 0.98  | 0.92  | 1.18  | 2.14  | 2.55  |
| 44 | 1095 | 1091 | 3,5-Octadien-2-one                | 5.17  | -     | -     | -     | -     | -     | -     |
| 45 | 1101 | 1099 | Linalool                          | 6.47  | -     | -     | -     | 0.45  | 0.98  | 0.45  |
| 46 | 1106 | 1102 | 2-Nonen-1-ol                      | 4.12  | -     | -     | -     | -     | -     | -     |
| 47 | 1109 | 1104 | $\alpha$ -Thujone                 | -     | 0.37  | 0.29  | 1.16  | 0.83  | 0.62  | 0.80  |
| 48 | 1110 | 1108 | Maltol                            | 1.75  | -     | -     | -     | -     | -     | -     |
| 49 | 1122 | 1119 | 3-Thujanone                       | -     | -     | -     | -     | -     | 0.16  | 0.33  |
| 50 | 1138 | 1142 | 3-Nonen-2-one                     | 2.54  | -     | -     | -     | -     | -     | -     |
| 51 | 1147 | 1143 | (E)-Sabinol                       | 0.93  | 4.01  | 2.69  | 0.27  | -     | 6.39  | 3.03  |
| 52 | 1151 | 1145 | Camphor                           | 1.36  | 0.22  | 0.93  | 0.98  | 0.72  | 0.82  | 0.65  |
| 53 | 1163 | 1153 | Citronellal                       | 0.41  | -     | -     | -     | -     | -     | -     |
| 54 | 1176 | 1167 | endo-Borneol                      | -     | -     | -     | -     | 0.26  | 0.95  | 0.16  |
| 55 | 1183 | 1173 | Isocamphopinone                   | -     | -     | -     | -     | 0.08  | 0.10  | 0.08  |
| 56 | 1189 | 1182 | Naphthalene                       | 2.44  | -     | -     | -     | -     | -     | -     |
| 57 | 1195 | 1189 | $\alpha$ -Terpineol               | 1.62  | -     | -     | -     | -     | -     | -     |

|    |      |      |                                                                  |      |      |      |      |      |      |      |
|----|------|------|------------------------------------------------------------------|------|------|------|------|------|------|------|
| 58 | 1197 | 1190 | Methyl salicylate                                                | 2.28 | -    | -    | -    | -    | -    | -    |
| 59 | 1208 | 1196 | Estragole                                                        | 1.14 | 2.03 | 2.48 | 3.49 | 2.59 | 3.12 | 3.41 |
| 60 | 1229 | 1220 | $\beta$ -Cyclocitral                                             | 2.07 | -    | -    | -    | -    | -    | -    |
| 61 | 1245 | 1228 | Citronellol                                                      | 0.39 | -    | -    | -    | 0.05 | 0.17 | 0.16 |
| 62 | 1251 | 1240 | Neral                                                            | 0.82 | -    | -    | -    | -    | -    | -    |
| 63 | 1265 | 1257 | Linalool acetate                                                 | 0.19 | 0.10 | 0.24 | 0.55 | 0.18 | 0.30 | 0.40 |
| 64 | 1270 | 1263 | (E)-2-Decenal                                                    | 1.53 | -    | -    | -    | -    | -    | -    |
| 65 | 1280 | 1270 | Geranial                                                         | 1.40 | -    | -    | -    | -    | -    | -    |
| 66 | 1363 | 1317 | n-Butyric acid 2-ethylhexyl ester                                | 2.76 | 0.10 | 0.09 | 0.09 | 0.14 | 0.16 | 0.05 |
| 67 | 1381 | 1380 | Propanoic acid. 2-methyl-, 3-hydroxy-2,2,4-trimethylpentyl ester | 4.59 | 0.09 | 0.10 | 0.13 | 0.02 | -    | -    |
| 68 | 1393 | 1386 | $\beta$ -Damascenone                                             | 0.80 | -    | -    | -    | -    | -    | -    |
| 69 | 1408 | 1408 | 6,10-Dimethyl-2-undecanone                                       | 0.91 | -    | -    | -    | -    | -    | -    |
| 70 | 1439 | 1426 | $\alpha$ -Ionone                                                 | 3.28 | 0.04 | 0.07 | 0.09 | 0.11 | 0.08 | 0.05 |
| 71 | 1459 | 1435 | (Z)-Geranylacetone                                               | 4.40 | -    | -    | -    | -    | -    | -    |
| 72 | 1476 | 1454 | Humulene                                                         |      | -    | -    | -    | -    | 0.06 | 0.03 |
| 73 | 1497 | 1486 | $\beta$ -Ionone                                                  | 3.94 | -    | -    | -    | 0.03 | -    | -    |
| 74 | 1608 | 1600 | Hexadecane                                                       | 0.28 | 0.05 | 0.15 | 0.27 | 0.13 | -    | -    |
| 75 | 1611 | 1606 | Geranyl isovalerate                                              | 0.41 | 0.03 | 0.07 | 0.32 | 0.05 | 0.74 | 0.28 |
| 76 | 1671 | 1649 | Hedione                                                          | 3.45 | 0.02 | 0.07 | 0.00 | -    | -    | -    |
| 77 | 1702 | 1700 | Heptadecane                                                      | 1.44 | -    | -    | -    | 0.14 | 0.55 | 0.26 |
| 78 | 1775 | 1755 | $\alpha$ -hexyl-Cinnamaldehyde                                   | 0.37 | 0.07 | 0.39 | 0.42 | -    | -    | -    |
| 79 | 1827 | 1818 | Vetivenic acid                                                   | 2.56 | -    |      |      | 0.35 | 1.30 | 0.77 |
| 80 | 1855 | 1844 | 6,10,14-Trimethylpentadecan-2-one                                | 0.32 | 0.20 | 1.05 | 0.81 | -    | -    | -    |
| 81 | 1863 | 1863 | Z-9-Hexadecen-1-ol                                               | 0.58 | -    | -    | -    | -    | -    | -    |

**Table S2** Profile of triterpenoids in *I. paraguariensis* and various varieties of *I. aquifolium* and *I. meserveae*.

| Compound,<br>TMS <sup>1</sup> | RI Exp. <sup>2</sup> | RI Lit. <sup>3</sup> | <i>I.</i><br><i>paraguariensis</i> | <i>I. aquifolium</i>                    |                   |                      | <i>I. meserveae</i> |          |                |
|-------------------------------|----------------------|----------------------|------------------------------------|-----------------------------------------|-------------------|----------------------|---------------------|----------|----------------|
|                               |                      |                      |                                    | Alaska                                  | Ferox<br>Argentea | Rubricaulis<br>Aurea | Blue<br>Angel       | Blue Boy | Golden<br>Girl |
|                               |                      |                      |                                    | Concentration (mg*g <sup>-1</sup> ) d.w |                   |                      |                     |          |                |
| $\alpha$ -Tocopherol          | 3221                 | 3226                 | 0.43                               | 1.72                                    | 0.61              | 0.39                 | 0.78                | 1.23     | 0.91           |
| $\beta$ -Sitosterol           | 3342                 | 3348                 | 0.86                               | 1.53                                    | 1.44              | 0.83                 | 1.34                | 1.28     | 0.97           |
| $\beta$ -Amyrin               | 3369                 | 3353                 | 1.44                               | 1.21                                    | 0.90              | 0.49                 | 1.87                | 1.95     | 1.43           |
| Germanicol                    | 3382                 | 3385                 | 0.05                               | 0.19                                    | 0.08              | 0.06                 | 0.11                | 0.11     | 0.16           |
| $\alpha$ -Amyrin              | 3412                 | 3406                 | 4.28                               | 3.22                                    | 1.87              | 0.36                 | 3.07                | 1.75     | 2.18           |
| Lupeol                        | 3429                 | 3435                 | 1.05                               | 2.18                                    | 1.39              | 0.42                 | 1.86                | 1.35     | 2.53           |
| Epilupeol                     | 3420                 | 3439                 | 0.54                               | 0.12                                    | 0.18              | 0.12                 | 0.22                | 0.15     | 0.10           |
| Unknown                       | 3502                 | -                    | 0.21                               | 0.36                                    | 0.19              | 0.10                 | 0.21                | 0.34     | 0.46           |
| Uvaol                         | 3531                 | 3540                 | 2.21                               | 2.42                                    | 1.03              | 0.37                 | 0.99                | 1.70     | 2.48           |
| Betulinic acid                | 3579                 | 3588                 | 1.42                               | 0.98                                    | 0.50              | 0.76                 | 0.19                | 0.42     | 0.59           |
| Oleanolic acid                | 3593                 | 3591                 | 2.03                               | 4.89                                    | 3.45              | 2.87                 | 4.08                | 6.52     | 4.31           |
| Ursolic acid                  | 3664                 | 3657                 | 1.23                               | 15.55                                   | 10.22             | 7.29                 | 14.44               | 16.11    | 13.51          |

<sup>1</sup> All compounds are TMS derivatives. <sup>2</sup> Experimental retention indices calculated against n-alkanes. <sup>3</sup> Retention indices according to the NIST20 database.

**Table S3** Saponins detected and provisionally identified in *Ilex paraguariensis* (Il.par) and *Ilex aquifolium* (Il.aq.) leaves extracts.

| No. | provisional name<br>[pseudomolecular ion<br>& retention time] | neutral<br>formula | error<br>[ppm] | RA [%]<br>(Il.par.) | RA [%]<br>(Il.aq.) | reported in<br>[1] | MS mode fragments<br>/30 eV/ (intensity%)                                                                                                 | MS2 mode fragments<br>/adjusted collision energy/                                                                                                                                                                                                                              | provisional identification<br>based on<br><i>Ilex</i> saponins database<br>and fragmentation<br>pathway |
|-----|---------------------------------------------------------------|--------------------|----------------|---------------------|--------------------|--------------------|-------------------------------------------------------------------------------------------------------------------------------------------|--------------------------------------------------------------------------------------------------------------------------------------------------------------------------------------------------------------------------------------------------------------------------------|---------------------------------------------------------------------------------------------------------|
| 1   | 1089, 6.29 min                                                | C53H86O23          | 6.2            | —                   | 1.64               |                    | 1089.5420 (100) [M-H] <sup>-</sup>                                                                                                        | —                                                                                                                                                                                                                                                                              | —                                                                                                       |
| 2   | 1089, 6.37 min                                                | C53H86O23          | 6.2            | —                   | 1.07               |                    | 1089.5420 (100) [M-H] <sup>-</sup>                                                                                                        | —                                                                                                                                                                                                                                                                              | —                                                                                                       |
| 3   | 911, 6.60 min                                                 | C47H76O17          | 2.7            | 0.79                | —                  |                    | 911.4985 (100) [M-H] <sup>-</sup>                                                                                                         | —                                                                                                                                                                                                                                                                              | —                                                                                                       |
| 4   | 911, 6.81 min                                                 | C47H76O17          | 4.7            | 1.35                | 2.29               |                    | 911.4967 (100) [M-H] <sup>-</sup>                                                                                                         | —                                                                                                                                                                                                                                                                              | —                                                                                                       |
| 5   | 1073, 7.07 min                                                | C53H86O22          | 4.3            | 1.10                | —                  |                    | 1073.5492 (100) [M-H] <sup>-</sup>                                                                                                        | —                                                                                                                                                                                                                                                                              | —                                                                                                       |
| 6   | 1089, 7.11 min                                                | C53H86O23          | 0.7            | —                   | 2.14               |                    | 1089.5479 (100) [M-H] <sup>-</sup>                                                                                                        | —                                                                                                                                                                                                                                                                              | —                                                                                                       |
| 7   | 927, 7.17 min                                                 | C47H76O18          | -0.8           | 2.76                | —                  |                    | 927.4966 (100) [M-H] <sup>-</sup>                                                                                                         | —                                                                                                                                                                                                                                                                              | —                                                                                                       |
| 8   | 1089, 7.22 min                                                | C53H86O23          | 6.3            | —                   | 0.82               |                    | 1089.5419 (100) [M-H] <sup>-</sup>                                                                                                        | —                                                                                                                                                                                                                                                                              | —                                                                                                       |
| 9   | 927, 7.41 min                                                 | C47H76O18          | 6.8            | 0.85                | —                  |                    | 927.4896 (100) [M-H] <sup>-</sup>                                                                                                         | —                                                                                                                                                                                                                                                                              | —                                                                                                       |
| 10  | 911, 7.53 min                                                 | C47H76O17          | 1.8            | —                   | 12.99              |                    | 911.4993 (100) [M-H] <sup>-</sup>                                                                                                         | —                                                                                                                                                                                                                                                                              | —                                                                                                       |
| 11  | 1073, 7.64 min                                                | C53H86O22          | 3.9            | 1.25                | —                  | +                  | 1073.5496 (100) [M-H] <sup>-</sup>                                                                                                        | —                                                                                                                                                                                                                                                                              | —                                                                                                       |
| 12  | 825, 7.74 min                                                 | C42H66O16          | -0.3           | 7.23                | 13.15              | +                  | 825.4291 (100) [M-H] <sup>-</sup>                                                                                                         | /65.5 eV/<br>825.43 (100) [M-H] <sup>-</sup><br>663.37 (22) [M-Hex-H] <sup>-</sup><br>487.34 (63) [AGL-H] <sup>-</sup> =<br>[M-Hex-HexA-H] <sup>-</sup><br>455.32 (28) [AGL-H <sub>2</sub> O-H] <sup>-</sup>                                                                   | ilexoside XLVI,<br>ilexoside XLVII,<br>ilexoside XXXIX                                                  |
| 13  | 1073, 7.79 min                                                | C53H86O22          | 6.6            | 2.31                | —                  |                    | 1073.5467 (100) [M-H] <sup>-</sup>                                                                                                        | —                                                                                                                                                                                                                                                                              | —                                                                                                       |
| 14  | 927, 7.85 min                                                 | C47H76O18          | -0.4           | 0.87                | —                  |                    | 927.4963 (100) [M-H] <sup>-</sup>                                                                                                         | —                                                                                                                                                                                                                                                                              | —                                                                                                       |
| 15  | 1073, 7.92 min                                                | C53H86O22          | 5.4            | 2.84                | —                  | +                  | 1073.5480 (100) [M-H] <sup>-</sup>                                                                                                        | —                                                                                                                                                                                                                                                                              | —                                                                                                       |
| 16  | 927, 7.97 min                                                 | C47H76O18          | 2.6            | 0.84                | 9.76               |                    | 927.4935 (100) [M-H] <sup>-</sup> ,<br>779.4592 (48)                                                                                      | —                                                                                                                                                                                                                                                                              | —                                                                                                       |
| 17  | 1073, 8.09 min                                                | C53H86O22          | 1.8            | 17.19               | 44.27              | +                  | 1119.5567 (24) [M+FA-H] <sup>-</sup> ,<br>1073.5519 (37) [M-H] <sup>-</sup> ,<br>911.5010 (100) [M-Hex-H] <sup>-</sup> ,<br>809.4272 (10) | /83.9 eV/<br>911.50 (28) [M-Hex-H] <sup>-</sup> ,<br>765.44 (16) [M-Hex-dxHex-H] <sup>-</sup> ,<br>749.45 (100.0) [M-Hex-Hex-H] <sup>-</sup> ,<br>603.39 (19) [M-Hex-Hex-dxHex-H] <sup>-</sup> ,<br>471.35 (17) [AGL-H] <sup>-</sup> =<br>[M-Hex-Hex-dxHex-Pen-H] <sup>-</sup> | latifolioside C,<br>kudinoside G,<br>latifolioside L,<br>latifolioside E                                |
| 18  | 927, 8.15 min                                                 | C47H76O18          | 8.2            | 3.60                | —                  |                    | 927.4883 (100) [M-H] <sup>-</sup>                                                                                                         | —                                                                                                                                                                                                                                                                              | —                                                                                                       |

| No. | provisional name<br>[pseudomolecular ion<br>& retention time] | neutral<br>formula | error<br>[ppm] | RA [%]<br>(IL.par.) | RA [%]<br>(IL.aq.) | reported in<br>[1] | MS mode fragments<br>/30 eV/ (intensity%)                                              | MS2 mode fragments<br>/adjusted collision energy/                                                                                                                                                                                                                 | provisional identification<br>based on<br><i>Ilex</i> saponins database<br>and fragmentation<br>pathway |
|-----|---------------------------------------------------------------|--------------------|----------------|---------------------|--------------------|--------------------|----------------------------------------------------------------------------------------|-------------------------------------------------------------------------------------------------------------------------------------------------------------------------------------------------------------------------------------------------------------------|---------------------------------------------------------------------------------------------------------|
| 19  | 927, 8.30 min                                                 | C47H76O18          | 0.2            | 7.72                | 27.22              | +                  | 927.4957 (65) [M-H] <sup>-</sup> ,<br>765.4428 (100) [M-Hex-H] <sup>-</sup>            | /72.2 eV/<br>765.44 (100) [M-Hex-H] <sup>-</sup> ,<br>603.40 (97) [M-Hex-Hex-H] <sup>-</sup> ,<br>469.76 [AGL-H <sub>2</sub> -H] <sup>-</sup> = [M-Hex-Hex-Pen-<br>3H] <sup>-</sup>                                                                               | godoside D,<br>ilekudinoside E,<br>ilexoside II,<br>ilexoside XV,<br>ilexsaponin B3                     |
| 20  | 1101, 8.52 min                                                | C54H86O23          | 3.6            | 1.88                | —                  |                    | 1101.5448 (39) [M-H] <sup>-</sup> ,<br>939.4933 (100) [M-Hex-H] <sup>-</sup>           | —                                                                                                                                                                                                                                                                 | —                                                                                                       |
| 21  | 1381, 8.56 min                                                | C65H106O31         | 4.4            | 11.17               | —                  | +                  | 1381.6590 (100) [M-H] <sup>-</sup>                                                     | /108.5 eV/<br>895.50 (9) [M-Hex-Hex-Hex-H] <sup>-</sup> ,<br>733.45 (82) [M-Hex-Hex-Hex-Hex-H] <sup>-</sup> ,<br>587.40 (77)<br>[M-Hex-Hex-Hex-Hex-dxHex-H] <sup>-</sup> ,<br>455.35 (100) [AGL-H] <sup>-</sup> =<br>[M-Hex-Hex-Hex-Hex-dxHex-Pen-H] <sup>-</sup> | matesaponin 5                                                                                           |
| 22  | 1131, 8.75 min                                                | C55H88O24          | 4.8            | 5.64                | —                  | +                  | 1131.5539 (55) [M-H] <sup>-</sup> ,<br>969.5026 (100) [M-Hex-H] <sup>-</sup>           | —                                                                                                                                                                                                                                                                 | —                                                                                                       |
| 23  | 927, 8.75 min                                                 | C47H76O18          | -0.3           | 0.88                | —                  |                    | 927.4962 (100) [M-H] <sup>-</sup>                                                      | —                                                                                                                                                                                                                                                                 | —                                                                                                       |
| 24  | 1101, 8.91 min                                                | C54H86O23          | 4.6            | 5.28                | —                  | +                  | 1101.5436 (43) [M-H] <sup>-</sup> ,<br>939.4918 (100) [M-Hex-H] <sup>-</sup>           | —                                                                                                                                                                                                                                                                 | —                                                                                                       |
| 25  | 809, 9.10 min                                                 | C42H66O15          | 1.8            | 36.02               | —                  |                    | 809.4314 (100) [M-H] <sup>-</sup>                                                      | /64.6 eV/<br>809.43 (100) [M-H] <sup>-</sup><br>647.38 (46) [M-Hex-H] <sup>-</sup><br>471.34 (37) [AGL-H] <sup>-</sup> =<br>[M-Hex-HexA-H] <sup>-</sup>                                                                                                           | ilekudinoside B,<br>ilexoside XXXI,<br>ilexoside XLVIII,<br>ilexoside L                                 |
| 26  | 1219.61, 9.15 min                                             | C59H96O26          | 5.1            | 57.97               | 37.27              | +                  | 1219.6120 (100) [M-H] <sup>-</sup> ,<br>895.5041 (78) [M-<br>(Hex+Hex)-H] <sup>-</sup> | /95.6 eV/<br>733.46 (96) [M-Hex-Hex-Hex-H] <sup>-</sup> ,<br>587.39 (66)<br>[M-Hex-Hex-Hex-dxHex-H] <sup>-</sup> ,<br>455.35 (100) [AGL-H] <sup>-</sup> =<br>[M-Hex-Hex-Hex-dxHex-Pen-H] <sup>-</sup>                                                             | matesaponin 4                                                                                           |
| 27  | 911, 9.25 min                                                 | C47H76O17          | 0.3            | 5.37                | 10.50              | +                  | 911.5007 (100) [M-H] <sup>-</sup>                                                      | —                                                                                                                                                                                                                                                                 | —                                                                                                       |
| 28  | 809, 9.29 min                                                 | C42H66O15          | 1.4            | 16.93               | —                  |                    | 809.4317 (100) [M-H] <sup>-</sup>                                                      | /64.6 eV/<br>809.43 (100) [M-H] <sup>-</sup><br>647.38 (36) [M-Hex-H] <sup>-</sup>                                                                                                                                                                                | ilekudinoside B,<br>ilexoside XXXI,<br>ilexoside XLVIII,<br>ilexoside L                                 |

| No. | provisional name<br>[pseudomolecular ion<br>& retention time] | neutral<br>formula | error<br>[ppm] | RA [%]<br>(IL.par.) | RA [%]<br>(IL.aq.) | reported in<br>[1] | MS mode fragments<br>/30 eV/ (intensity%)                                             | MS2 mode fragments<br>/adjusted collision energy/                                                                                                                                                                                                           | provisional identification<br>based on<br><i>Ilex</i> saponins database<br>and fragmentation<br>pathway |
|-----|---------------------------------------------------------------|--------------------|----------------|---------------------|--------------------|--------------------|---------------------------------------------------------------------------------------|-------------------------------------------------------------------------------------------------------------------------------------------------------------------------------------------------------------------------------------------------------------|---------------------------------------------------------------------------------------------------------|
|     |                                                               |                    |                |                     |                    |                    |                                                                                       | 471.34 (22) [AGL-H] <sup>-</sup> =<br>[M-Hex-HexA-H] <sup>-</sup>                                                                                                                                                                                           |                                                                                                         |
| 29  | 1073, 9.53 min                                                | C53H86O22          | 5.4            | 6.76                | 1.89               | +                  | 1073.5480 (44) [M-H] <sup>-</sup> ,<br>765.4423 (100)<br>[M-Hex-dxHex-H] <sup>-</sup> | —                                                                                                                                                                                                                                                           | —                                                                                                       |
| 30  | 1073, 9.64 min                                                | C53H86O22          | -2.1           | —                   | 2.29               |                    | 1073.5560 (68) [M-H] <sup>-</sup> ,<br>911.5013 (100) [M-Hex-H] <sup>-</sup>          | —                                                                                                                                                                                                                                                           | —                                                                                                       |
| 31  | 1073, 9.90 min                                                | C53H86O22          | -2.8           | 1.61                | —                  | +                  | 1073.5568 (100) [M-H] <sup>-</sup>                                                    | —                                                                                                                                                                                                                                                           | —                                                                                                       |
| 32  | 911, 10.04 min                                                | C47H76O17          | 0.7            | —                   | 3.27               |                    | 911.5003 (100) [M-H] <sup>-</sup>                                                     | —                                                                                                                                                                                                                                                           | —                                                                                                       |
| 33  | 1277, 10.20 min                                               | C62H98O28          | 5.5            | 3.81                | —                  | +                  | 1277.6102 (100) [M-H] <sup>-</sup>                                                    | —                                                                                                                                                                                                                                                           | —                                                                                                       |
| 34  | 1247, 10.48 min                                               | C60H96O27          | 4.1            | 9.43                | —                  | +                  | 1247.6015 (100) [M-H] <sup>-</sup>                                                    | /97.8 eV/<br>881.49 (14) [M-Ac-Hex-Hex-H] <sup>-</sup> ,<br>749.44 (49) [M-Ac-Hex-Hex-Pen-H] <sup>-</sup> ,<br>587.40 (100.0)<br>[M-Ac-Hex-Hex-Pen-Hex-H] <sup>-</sup> ,<br>455.35 (36) [AGL-H] <sup>-</sup> =<br>[M-Ac-Hex-Hex-Pen-Hex-Pen-H] <sup>-</sup> | acetylated ilexoside X,<br>acetylated ilexoside XX                                                      |
| 35  | 1235, 10.57 min                                               | C62H92O25          | 4.4            | 5.60                | —                  |                    | 1235.5800 (100) [M-H] <sup>-</sup> ,<br>1073.5282 (18) [M-Hex-H] <sup>-</sup>         | —                                                                                                                                                                                                                                                           | —                                                                                                       |
| 36  | 1235, 10.70 min                                               | C62H92O25          | 3.6            | 5.42                | —                  |                    | 1235.5810 (100) [M-H] <sup>-</sup> ,<br>1073.5272 (18) [M-Hex-H] <sup>-</sup>         | —                                                                                                                                                                                                                                                           | —                                                                                                       |
| 37  | 1057, 10.85 min                                               | C53H86O21          | 4.6            | 40.28               | 16.38              | +                  | 1057.5540 (100) [M-H] <sup>-</sup>                                                    | /82.6 eV/<br>733.4545 (100) [M-Hex-Hex-H] <sup>-</sup> ,<br>455.3508 (3.5) [AGL-H] <sup>-</sup> =<br>[M-Hex-Hex-dxHex-Pen-H] <sup>-</sup>                                                                                                                   | ilekudinoside A,<br>matesaponin 2                                                                       |
| 38  | 927, 10.91 min                                                | C47H76O18          | 1.5            | —                   | 17.71              | +                  | 927.4945 (100) [M-H] <sup>-</sup>                                                     | /72.2 eV/<br>765.45 (100) [M-Hex-H] <sup>-</sup><br>487.33 (71) [M-Hex-dxHex-Pen-H] <sup>-</sup>                                                                                                                                                            | kudinoside A,<br>kudinoside F                                                                           |
| 39  | 927, 11.06 min                                                | C47H76O18          | 1.0            | —                   | 3.21               | +                  | 927.4950 (100) [M-H] <sup>-</sup>                                                     | —                                                                                                                                                                                                                                                           | —                                                                                                       |
| 40  | 1235, 11.09 min                                               | C62H92O25          | 4.9            | 7.86                | —                  |                    | 1235.5794 (100) [M-H] <sup>-</sup>                                                    | —                                                                                                                                                                                                                                                           | —                                                                                                       |
| 41  | 1235, 11.09 min                                               | C62H92O25          | 6.0            | 10.00               | —                  |                    | 1235.5781 (100) [M-H] <sup>-</sup>                                                    | —                                                                                                                                                                                                                                                           | —                                                                                                       |
| 42  | 1115, 11.14 min                                               | C55H88O23          | 7.0            | 5.50                | —                  | +                  | 1115.5566 (100) [M-H] <sup>-</sup>                                                    | —                                                                                                                                                                                                                                                           | —                                                                                                       |

| No. | provisional name<br>[pseudomolecular ion<br>& retention time] | neutral<br>formula | error<br>[ppm] | RA [%]<br>(IL.par.) | RA [%]<br>(IL.aq.) | reported in<br>[1] | MS mode fragments<br>/30 eV/ (intensity%)                                      | MS2 mode fragments<br>/adjusted collision energy/                                                                                                                                                                              | provisional identification<br>based on<br><i>Ilex</i> saponins database<br>and fragmentation<br>pathway |
|-----|---------------------------------------------------------------|--------------------|----------------|---------------------|--------------------|--------------------|--------------------------------------------------------------------------------|--------------------------------------------------------------------------------------------------------------------------------------------------------------------------------------------------------------------------------|---------------------------------------------------------------------------------------------------------|
| 43  | 1115, 11.28 min                                               | C55H88O23          | 4.7            | 29.29               | —                  | +                  | 1115.5592 (100) [M-H] <sup>-</sup>                                             | /87.2 eV/<br>749.45 (48) [M-Ac-Hex-Hex-H] <sup>-</sup> ,<br>731.44 (79),<br>587.40 (100) [M-Ac-Hex-Hex-Hex-H] <sup>-</sup> ,<br>455.35 (29) [AGL-H] <sup>-</sup> =<br>[M-Ac-Hex-Hex-Hex-Pen-H] <sup>-</sup>                    | acetylated matesaponin 3                                                                                |
| 44  | 1057, 11.90 min                                               | C53H86O21          | 3.7            | 44.95               | 10.25              | +                  | 1057.5550 (39) [M-H] <sup>-</sup> ,<br>895.5047 (100) [M-Hex-H] <sup>-</sup>   | /82.6 eV/<br>895.51 (39) [M-Hex-H] <sup>-</sup> ,<br>733.45 (100) [M-Hex-Hex-H] <sup>-</sup> ,<br>587.40 (60) [M-Hex-Hex-dxHex-H] <sup>-</sup> ,<br>455.35 (73) [AGL-H] <sup>-</sup> =<br>[M-Hex-Hex-dxHex-Pen-H] <sup>-</sup> | ilekudinoside A,<br>matesaponin 2                                                                       |
| 45  | 911, 12.05 min                                                | C47H76O17          | 1.6            | 6.80                | —                  |                    | 911.4995 (100) [M-H] <sup>-</sup>                                              | —                                                                                                                                                                                                                              | —                                                                                                       |
| 46  | 1057, 12.15 min                                               | C53H86O21          | 4.4            | 26.92               | 8.40               | +                  | 1057.5542 (49.5) [M-H] <sup>-</sup> ,<br>895.5047 (100) [M-Hex-H] <sup>-</sup> | /82.6 eV/<br>895.50 (27) [M-Hex-H] <sup>-</sup> ,<br>733.45 (100) [M-Hex-Hex-H] <sup>-</sup> ,<br>587.40 (60) [M-Hex-Hex-dxHex-H] <sup>-</sup> ,<br>455.35 (49) [AGL-H] <sup>-</sup> =<br>[M-Hex-Hex-dxHex-Pen-H] <sup>-</sup> | ilekudinoside A,<br>matesaponin 2                                                                       |
| 47  | 793, 12.31 min                                                | C42H66O16          | 2.2            | 12.22               | —                  |                    | 793.4362 (100) [M-H] <sup>-</sup>                                              | /63.6 eV/<br>793.4331 (100) [M-H] <sup>-</sup> ,<br>631.3840 (76) [M-Hex-H] <sup>-</sup> ,<br>569.3845 (97),<br>455.3523 (32) [AGL-H] <sup>-</sup> =<br>[M-Hex-HexA-H] <sup>-</sup>                                            | chikusetsusaponin IV a                                                                                  |
| 48  | 911, 12.54 min                                                | C47H76O17          | 2.1            | 100.00              | —                  | +                  | 911.4991 (76) [M-H] <sup>-</sup> ,<br>749.4472 (100) [M-Hex-H] <sup>-</sup>    | /70.9 eV/<br>793.43 (68),<br>587.40 (75) [M-Hex-Hex-H] <sup>-</sup> ,<br>569.39 (100),<br>455.35 (28) [AGL-H] <sup>-</sup> =<br>[M-Hex-Hex-Pen-H] <sup>-</sup>                                                                 | matesaponin 1                                                                                           |
| 49  | 911, 12.74 min                                                | C47H76O17          | 3.4            | 14.06               | —                  | +                  | 911.4979 (96) [M-H] <sup>-</sup> ,<br>749.4463 (100) [M-Hex-H] <sup>-</sup>    | —                                                                                                                                                                                                                              | —                                                                                                       |
| 50  | 911, 12.94 min                                                | C47H76O17          | 3.5            | 8.48                | —                  | +                  | 911.4978 (58) [M-H] <sup>-</sup> ,<br>749.4461 (100) [M-Hex-H] <sup>-</sup>    | —                                                                                                                                                                                                                              | —                                                                                                       |
| 51  | 1115, 13.34 min                                               | C55H88O23          | 7.6            | 1.56                | —                  | +                  | 1115.5559 (100) [M-H] <sup>-</sup>                                             | —                                                                                                                                                                                                                              | —                                                                                                       |



| No. | provisional name<br>[pseudomolecular ion<br>& retention time] | neutral<br>formula | error<br>[ppm] | RA [%]<br>(IL.par.) | RA [%]<br>(IL.aq.) | reported in<br>[1] | MS mode fragments<br>/30 eV/ (intensity%)                                    | MS2 mode fragments<br>/adjusted collision energy/                                                                                                                                                                       | provisional identification<br>based on<br><i>Ilex</i> saponins database<br>and fragmentation<br>pathway |
|-----|---------------------------------------------------------------|--------------------|----------------|---------------------|--------------------|--------------------|------------------------------------------------------------------------------|-------------------------------------------------------------------------------------------------------------------------------------------------------------------------------------------------------------------------|---------------------------------------------------------------------------------------------------------|
| 52  | 1085, 13.69 min                                               | C54H86O22          | 4.8            | 3.57                | —                  | +                  | 1085.5486 (50) [M-H] <sup>-</sup> ,<br>923.4966 (100) [M-Hex-H] <sup>-</sup> | —                                                                                                                                                                                                                       | —                                                                                                       |
| 53  | 911, 13.98 min                                                | C47H76O17          | 0.9            | 1.94                | 100.00             |                    | 911.5002 (100) [M-H] <sup>-</sup>                                            | /70.9 eV/<br>911.50 (14) [M-H] <sup>-</sup><br>749.45 (100) [M-Hex-H] <sup>-</sup><br>603.39 (19) [M-Hex-dxHex-H] <sup>-</sup><br>471.35 (22) [AGL-H] <sup>-</sup> =<br>[M-Hex-dxHex-Pen-H] <sup>-</sup>                | ilexaponin B2,<br>latifolioside A,<br>latifolioside B,<br>latifolioside D                               |
| 54  | 911, 14.24 min                                                | C47H76O17          | 1.2            | 2.04                | 46.60              |                    | 911.4999 (100) [M-H] <sup>-</sup>                                            | /70.9 eV/<br>749.45 (100) [M-Hex-H] <sup>-</sup><br>471.35 (28) [AGL-H] <sup>-</sup> =<br>[M-Hex-dxHex-Pen-H] <sup>-</sup>                                                                                              | ilexaponin B2,<br>latifolioside A,<br>latifolioside B,<br>latifolioside D                               |
| 55  | 895, 14.40 min                                                | C47H76O16          | 2.3            | 16.67               | —                  | +                  | 895.5040 (90) [M-H] <sup>-</sup> ,<br>733.4520 (100) [M-Hex-H] <sup>-</sup>  | /69.7. eV/<br>733.4552 (100) [M-Hex-H] <sup>-</sup> ,<br>455.3517 (5) [AGL-H] <sup>-</sup> =<br>[M-Hex-dxHex-Pen-H] <sup>-</sup>                                                                                        | mateglycoside D,<br>matesaponin J3,<br>patriniaglycoside B-I,<br>patriniaglycoside B-II                 |
| 56  | 895, 14.68 min                                                | C47H76O16          | 3.3            | 7.16                | 5.15               | +                  | 895.5031 (90) [M-H] <sup>-</sup> ,<br>733.4517 (100) [M-Hex-H] <sup>-</sup>  | —                                                                                                                                                                                                                       | mateglycoside D,<br>matesaponin J3,<br>patriniaglycoside B-I,<br>patriniaglycoside B-II                 |
| 57  | 953, 14.90 min                                                | C49H78O18          | 3.9            | 31.11               | —                  | +                  | 953.5078 (82) [M-H] <sup>-</sup> ,<br>791.4573 (100) [M-Hex-H] <sup>-</sup>  | /74.3 eV/<br>749.45 (41) [M-Hex-Ac-H] <sup>-</sup> ,<br>731.43 (76) [M-Hex-AA-H] <sup>-</sup> ,<br>587.39 (100) [M-Hex-Hex-H] <sup>-</sup> ,<br>455.35 (36) [AGL-H] <sup>-</sup> =<br>[M-Hex-Hex-Ac-Pen-H] <sup>-</sup> | acetylated 911, 13.98 min,<br>acetylated 911, 14.24 min                                                 |
| 58  | 765, 15.24 min                                                | C41H66O13          | 0.8            | —                   | 24.32              |                    | 765.4424 (100) [M-H] <sup>-</sup>                                            | —                                                                                                                                                                                                                       | —                                                                                                       |
| 59  | 765, 15.52 min                                                | C41H66O13          | 1.6            | —                   | 4.52               |                    | 765.4418 (100) [M-H] <sup>-</sup>                                            | —                                                                                                                                                                                                                       | —                                                                                                       |
| 60  | 911, 15.77 min                                                | C47H76O17          | 0.9            | —                   | 23.31              |                    | 911.5002 (100) [M-H] <sup>-</sup>                                            | —                                                                                                                                                                                                                       | —                                                                                                       |
| 61  | 911, 16.00 min                                                | C47H76O17          | 1.9            | —                   | 27.35              |                    | 911.4992 (100) [M-H] <sup>-</sup>                                            | —                                                                                                                                                                                                                       | —                                                                                                       |
| 62  | 1219.58, 16.30 min                                            | C58H92O27          | -5.6           | 7.07                | —                  |                    | 1219.5821 (100) [M-H] <sup>-</sup>                                           | —                                                                                                                                                                                                                       | —                                                                                                       |
| 63  | 1219.58, 16.60 min                                            | C58H92O27          | 5.7            | 6.21                | —                  |                    | 1219.5837 (100) [M-H] <sup>-</sup>                                           | —                                                                                                                                                                                                                       | —                                                                                                       |
| 64  | 895, 20.46 min                                                | C47H76O16          | 0.9            | 6.17                | 39.89              |                    | 895.5053 (100) [M-H] <sup>-</sup>                                            | —                                                                                                                                                                                                                       | —                                                                                                       |
| 65  | 895, 20.59 min                                                | C47H76O16          | 0.3            | 4.50                | 39.29              |                    | 895.5058 (100) [M-H] <sup>-</sup>                                            | —                                                                                                                                                                                                                       | —                                                                                                       |

| No. | provisional name<br>[pseudomolecular ion<br>& retention time] | neutral<br>formula                              | error<br>[ppm] | RA [%]<br>(Il.par.) | RA [%]<br>(Il.aq.) | reported in<br>[1] | MS mode fragments<br>/30 eV/ (intensity%) | MS2 mode fragments<br>/adjusted collision energy/ | provisional identification<br>based on<br><i>Ilex</i> saponins database<br>and fragmentation<br>pathway |
|-----|---------------------------------------------------------------|-------------------------------------------------|----------------|---------------------|--------------------|--------------------|-------------------------------------------|---------------------------------------------------|---------------------------------------------------------------------------------------------------------|
| 66  | 749, 22.24 min                                                | C <sub>41</sub> H <sub>66</sub> O <sub>12</sub> | 1.0            | 9.83                | —                  |                    | 749.4460 (100) [M-H] <sup>-</sup>         | —                                                 | —                                                                                                       |

Abbreviations: AA—acetic acid loss, Ac—acetylation loss, AGL—aglycone, dxHex—deoxyhexose loss, Hex—hexose loss, HexA—hexuronic acid loss, Pen—pentose loss, RA—the relative area of peak, when the area of the largest one is calculated as 100%

**Table S4** Fatty acid profile in leaves of *I. paraguariensis* and various varieties of *I. aquifolium* and *I. meserveae*.

| Fatty acid <sup>1</sup> |          | RI Exp. <sup>2</sup> | RI Lit. <sup>3</sup> | <i>I. paraguariensis</i> | <i>I. aquifolium</i>                    |                   |                      | <i>I. meserveae</i> |          |                |
|-------------------------|----------|----------------------|----------------------|--------------------------|-----------------------------------------|-------------------|----------------------|---------------------|----------|----------------|
|                         |          |                      |                      |                          | Alaska                                  | Ferox<br>Argentea | Rubricaulis<br>Aurea | Blue<br>Angel       | Blue Boy | Golden<br>Girl |
|                         |          |                      |                      |                          | Concentration (mg*g <sup>-1</sup> ) d.w |                   |                      |                     |          |                |
| Capric acid             | C10:0    | 1057                 | 1060                 | 0.42                     | 0.14                                    | 0.09              | 0.33                 | 0.13                | 0.28     | 0.15           |
| Lauric acid             | C12:0    | 1201                 | 1200                 | 0.43                     | 0.20                                    | 0.09              | 0.26                 | 0.18                | 0.21     | 0.22           |
| Myristic acid           | C14:0    | 1402                 | 1400                 | 1.02                     | 0.82                                    | 0.73              | 0.95                 | 0.93                | 0.89     | 0.90           |
| Myristoleic acid        | C14:1ω5  | 1437                 | 1436                 | 0.38                     | 0.23                                    | 0.13              | 0.35                 | 0.21                | 0.31     | 0.26           |
| Pentadecylic acid       | C15:0    | 1499                 | 1500                 | 0.46                     | 0.23                                    | 0.13              | 0.23                 | 0.20                | 0.14     | 0.24           |
| Palmitic acid           | C16:0    | 1599                 | 1600                 | 18.08                    | 12.05                                   | 15.03             | 12.66                | 14.03               | 13.04    | 12.51          |
| Sapienic acid           | C16:1ω10 | 1629                 | 1628                 | 0.73                     | 0.41                                    | 0.30              | 0.21                 | 0.22                | 0.15     | 0.18           |
| Palmitoleic acid        | C16:1ω7  | 1635                 | 1632                 | 2.36                     | 0.99                                    | 3.19              | 1.16                 | 2.14                | 0.92     | 1.01           |
| Margaric acid           | C17:0    | 1699                 | 1700                 | 0.59                     | 0.32                                    | 0.14              | 0.32                 | 0.22                | 0.28     | 0.39           |
| Stearic acid            | C18:0    | 1801                 | 1800                 | 6.39                     | 2.37                                    | 4.17              | 2.50                 | 4.12                | 2.56     | 2.60           |
| Oleic acid              | C18:1ω9  | 1817                 | 1819                 | 9.03                     | 3.60                                    | 4.39              | 3.92                 | 7.61                | 3.41     | 3.37           |
| Vaccenic acid           | C18:1ω7  | 1821                 | 1824                 | 1.96                     | 0.55                                    | 1.82              | 0.64                 | 1.28                | 0.50     | 0.59           |
| Linoleic acid           | C18:2ω6  | 1867                 | 1874                 | 4.23                     | 8.40                                    | 5.84              | 8.72                 | 5.63                | 8.21     | 10.08          |
| α-Linolenic acid        | C18:3ω3  | 1933                 | 1928                 | 5.92                     | 21.31                                   | 9.72              | 19.28                | 9.09                | 19.61    | 22.16          |
| Eicosatetraenoic acid   | C20:4ω3  | 2101                 | 2109                 | 0.60                     | 0.19                                    | 0.38              | 0.10                 | 0.21                | 0.17     | 0.66           |
| Arachidonic acid        | C20:4ω3  | 2118                 | 2115                 | 2.71                     | 0.71                                    | 9.11              | 0.54                 | 1.84                | 0.40     | 0.58           |
| Docosahexaenoic acid    | C22:6ω3  | 2419                 | 2416                 | 1.67                     | 0.53                                    | 1.73              | 0.66                 | 0.93                | 0.45     | 0.66           |

<sup>1</sup> All compounds are expressed as GC-MS percentage of methyl esters; <sup>2</sup> experimental retention indices calculated against saturated fatty acids; <sup>3</sup> retention indices according to the Lipids Library 1.0;

1. Pachura, N.; Kupczyński, R.; Sycz, J.; Kuklińska, A.; Zwyrzykowska-Wodzińska, A.; Wińska, K.; Owczarek, A.; Kuropka, P.; Nowaczyk, R.; Bąbelewski, P., et al. Biological Potential and Chemical Profile of European Varieties of Ilex. *Foods* **2022**, *11*, 47.
